# Supplementary material
Source: PubMed Central journal article supplement (PMC6037925)
Supplement: tom-00187-16-s001.pdf [file tom-00187-16-s001.pdf]

## Supplemental Data

### Simulating the Effect of Spectroscopic MRI as a Metric for Radiation Therapy Planning in Patients with Glioblastoma

\*J. Scott Cordova<sup>1</sup>, \*Shravan Kandula<sup>2,3</sup>, Saumya Gurbani<sup>1,6</sup>, Jim Zhong MD<sup>2</sup>, Mital Tejani<sup>2</sup>, Oluwatosin Kayode<sup>2</sup>, Kirtesh Patel<sup>2</sup>, Roshan Prabhu<sup>4</sup>, Eduard Schreibmann<sup>2</sup>, Ian Crocker<sup>2,5</sup>, Chad A. Holder<sup>1</sup>, Hyunsuk Shim<sup>1,5,6</sup>, and Hui-Kuo Shu<sup>2,5</sup>

<sup>1</sup>Department of Radiology and Imaging Sciences, Emory University School of Medicine, 1648 Pierce Dr NE, Atlanta, GA, USA; <sup>2</sup>Department of Radiation Oncology, Emory University School of Medicine, 1648 Pierce Dr NE, Atlanta, GA, USA; <sup>3</sup>Florida Hospital Medical Group, Radiation Oncology Associates, 2501 N Orange Avenue, Orlando, FL, USA; <sup>4</sup>Southeast Radiation Oncology Group, Levine Cancer Institute, 1021 Morehead Medical Dr Charlotte, NC, USA; <sup>5</sup>Winship Cancer Institute, 1365-C Clifton Rd NE Atlanta, GA, USA; <sup>6</sup>Department of Biomedical Engineering, Georgia Institute of Technology, Atlanta, GA, USA.

\*Authors contributed equally to this work.

**Journal:** Tomography

#### **Corresponding Authors**

Hyunsuk Shim, Ph.D.  
Department of Radiology  
Emory University School of Medicine  
1701 Uppergate Drive, C5018, Atlanta, GA 30322  
Telephone: (404) 778-4564  
E-mail: [hshim@emory.edu](mailto:hshim@emory.edu)

Hui-Kuo Shu, MD, PhD  
Department of Radiation Oncology  
Emory University School of Medicine  
1365 Clifton Rd, Atlanta, GA 30322.  
Telephone: (404) 778-3473  
E-mail: [hgshu@emory.edu](mailto:hgshu@emory.edu)

**Supplementary Table 1.** Patient, tumor, and target characteristics

| <b>Patient</b> | <b>Age (yrs)</b> | <b>Tumor location</b>  | <b>IDH</b> | <b>MGMT</b>  | <b>Surgical Outcome</b> | <b>GTV1 (cm<sup>3</sup>)</b> | <b>GTV2 (cm<sup>3</sup>)</b> |
|----------------|------------------|------------------------|------------|--------------|-------------------------|------------------------------|------------------------------|
| 1              | 64               | Right parieto-temporal | wt         | unmethylated | GTR                     | 154.6                        | 46.4                         |
| 2              | 62               | Left temporo-occipital | wt         | unmethylated | STR                     | 175.9                        | 48.4                         |
| 3              | 56               | Right frontal          | wt         | unmethylated | STR                     | 109.2                        | 43.4                         |
| 4              | 43               | Right frontal          | wt         | unmethylated | STR                     | 254.0                        | 78.8                         |
| 5              | 83               | Right parietal         | wt         | unmethylated | STR                     | 292.9                        | 37.3                         |
| 6              | 46               | Left parietal          | wt         | N/A          | STR                     | 72.1                         | 34.8                         |
| 7              | 45               | Left parieto-temporal  | wt         | unmethylated | GTR                     | 89.7                         | 14.8                         |
| 8              | 60               | Right parieto-temporal | wt         | methylated   | Biopsy                  | 154.6                        | 35.1                         |
| 9              | 46               | Left temporal          | mt         | methylated   | STR                     | 204.0                        | 35.3                         |
| 10             | 73               | Left temporal          | wt         | methylated   | STR                     | 74.7                         | 24.0                         |
| 11             | 41               | Left occipital         | wt         | methylated   | GTR                     | 53.1                         | 17.4                         |

**Abbreviations:** wt – wild type. GTV1 – Gross target volume 1 (corresponding to T2-FLAIR abnormality). GTV2 – Gross target volume 2 (corresponding to the resection cavity and residual contrast-enhancing tumor). GTR – gross total resection ( $\leq 1$  cm<sup>3</sup> contrast-enhancing tumor on postoperative MRI). STR – subtotal resection ( $\geq 1$  cm<sup>3</sup> contrast-enhancing tumor on postoperative MRI).

**Supplementary Table 2. Volumetric and Spatial Data**

| Cho/NAA – 1.5-fold  |                         |                              |                    |       |                         |                              |                    |       |
|---------------------|-------------------------|------------------------------|--------------------|-------|-------------------------|------------------------------|--------------------|-------|
| Patient             | CTV1 (cm <sup>3</sup> ) | sMRI_CTV1 (cm <sup>3</sup> ) | %volume difference | DICE  | CTV2 (cm <sup>3</sup> ) | sMRI_CTV2 (cm <sup>3</sup> ) | %volume difference | DICE  |
| 1                   | 276.5                   | 287.0                        | 3.8                | 0.60  | 95.7                    | 148.5                        | 55.3               | 0.67  |
| 2                   | 298.3                   | 306.5                        | 2.7                | 0.53  | 93.1                    | 153.6                        | 70.0               | 0.54  |
| 3                   | 187.2                   | 247.1                        | 32.0               | 0.62  | 90.9                    | 191.7                        | 111.1              | 0.50  |
| 4                   | 289.7                   | 295.1                        | 1.86               | 0.34  | 103.8                   | 123.6                        | 19.1               | 0.50  |
| 5                   | 415.7                   | 449.6                        | 8.2                | 0.47  | 148.6                   | 219.7                        | 47.8               | 0.58  |
| 6                   | 417.2                   | 462.9                        | 11.0               | 0.29  | 91.4                    | 127.1                        | 39.0               | 0.45  |
| 7                   | 178.7                   | 184.9                        | 3.5                | 0.42  | 43.3                    | 72.8                         | 68.2               | 0.51  |
| 8                   | 343.9                   | 349.0                        | 1.5                | 0.53  | 90.3                    | 134.9                        | 49.3               | 0.75  |
| 9                   | 347.1                   | 352.1                        | 1.4                | 0.37  | 88.1                    | 123.2                        | 39.8               | 0.55  |
| 10                  | 138.5                   | 163.4                        | 18.0               | 0.46  | 44.9                    | 89.4                         | 99.1               | 0.32  |
| 11                  | 111.1                   | 189.8                        | 70.8               | 0.38  | 45.6                    | 144.2                        | 216.1              | 0.21  |
| Mean                | 273.1                   | 298.9                        | 14.1               | 0.46  | 85.1                    | 139.0                        | 74.1               | 0.51  |
| SD                  | 106.4                   | 100.5                        | 21.0               | 0.102 | 31.0                    | 41.4                         | 54.1               | 0.142 |
| Cho/NAA – 1.75-fold |                         |                              |                    |       |                         |                              |                    |       |
| Patient             | CTV1 (cm <sup>3</sup> ) | sMRI_CTV1 (cm <sup>3</sup> ) | %volume difference | DICE  | CTV2 (cm <sup>3</sup> ) | sMRI_CTV2 (cm <sup>3</sup> ) | %volume difference | DICE  |
| 1                   | 276.5                   | 283.0                        | 2.4                | 0.53  | 95.7                    | 131.9                        | 37.8               | 0.69  |
| 2                   | 298.3                   | 302.3                        | 1.3                | 0.44  | 93.1                    | 132.0                        | 41.7               | 0.55  |
| 3                   | 187.2                   | 216.4                        | 15.6               | 0.62  | 90.9                    | 153.1                        | 68.5               | 0.57  |
| 4                   | 289.7                   | 294.3                        | 1.6                | 0.28  | 103.8                   | 114.0                        | 9.8                | 0.50  |
| 5                   | 415.7                   | 432.9                        | 4.1                | 0.41  | 148.6                   | 186.2                        | 25.3               | 0.62  |
| 6                   | 417.2                   | 462.8                        | 10.9               | 0.19  | 91.4                    | 108.0                        | 18.1               | 0.41  |
| 7                   | 178.7                   | 183.0                        | 2.4                | 0.35  | 43.3                    | 63.5                         | 46.7               | 0.52  |
| 8                   | 343.9                   | 347.7                        | 1.1                | 0.45  | 90.3                    | 115.5                        | 27.8               | 0.79  |
| 9                   | 347.1                   | 350.0                        | 0.8                | 0.29  | 88.1                    | 106.1                        | 20.4               | 0.56  |
| 10                  | 138.5                   | 153.5                        | 10.8               | 0.36  | 44.9                    | 69.5                         | 54.7               | 0.34  |
| 11                  | 111.1                   | 150.8                        | 35.7               | 0.34  | 45.6                    | 97.2                         | 113.1              | 0.26  |
| Mean                | 273.1                   | 288.8                        | 7.88               | 0.39  | 85.1                    | 116.1                        | 42.2               | 0.53  |
| SD                  | 106.4                   | 106.0                        | 10.5               | 0.115 | 31.0                    | 35.0                         | 29.2               | 0.144 |
| Cho/NAA – 2.0-fold  |                         |                              |                    |       |                         |                              |                    |       |
| Patient             | CTV1 (cm <sup>3</sup> ) | sMRI_CTV1 (cm <sup>3</sup> ) | %volume difference | DICE  | CTV2 (cm <sup>3</sup> ) | sMRI_CTV2 (cm <sup>3</sup> ) | %volume difference | DICE  |
| 1                   | 276.5                   | 281.3                        | 1.7                | 0.48  | 95.7                    | 122.5                        | 28.1               | 0.68  |
| 2                   | 298.3                   | 300.5                        | 0.7                | 0.38  | 93.1                    | 120.0                        | 28.7               | 0.54  |
| 3                   | 187.2                   | 202.8                        | 8.3                | 0.57  | 90.9                    | 128.9                        | 41.9               | 0.60  |
| 4                   | 289.7                   | 293.7                        | 1.4                | 0.23  | 103.8                   | 109.9                        | 5.9                | 0.46  |
| 5                   | 415.7                   | 425.1                        | 2.3                | 0.35  | 148.6                   | 167.4                        | 12.7               | 0.62  |
| 6                   | 417.2                   | 462.8                        | 10.9               | 0.14  | 91.4                    | 100.9                        | 10.3               | 0.34  |
| 7                   | 178.7                   | 181.6                        | 1.6                | 0.30  | 43.3                    | 57.3                         | 32.4               | 0.51  |
| 8                   | 343.9                   | 346.3                        | 0.7                | 0.39  | 90.3                    | 105.1                        | 16.4               | 0.79  |
| 9                   | 347.1                   | 349.6                        | 0.7                | 0.20  | 88.1                    | 96.0                         | 8.9                | 0.50  |
| 10                  | 138.5                   | 150.1                        | 8.4                | 0.27  | 44.9                    | 59.6                         | 32.6               | 0.31  |
| 11                  | 111.1                   | 131.7                        | 18.5               | 0.29  | 45.6                    | 72.2                         | 58.2               | 0.31  |
| Mean                | 273.1                   | 284.1                        | 5.02               | 0.33  | 85.1                    | 103.6                        | 25.1               | 0.51  |
| SD                  | 106.4                   | 109.0                        | 5.81               | 0.119 | 31.0                    | 32.4                         | 16.1               | 0.148 |

**Abbreviations:** CTV – clinical target volume based on CT and MRI findings; sMRI\_CTV – clinical target volume consisting of union of sMRI contour and clinical target volume based on CT and MRI findings; cm<sup>3</sup> – volume in cubic centimeters; DICE - dice similarity coefficient between sMRI contour alone and respective CTV1 or CTV2.

**Supplementary Table 3.** Cho/NAA contour extending outside of prescription isodoses

| <b>1.5-fold Cho/NAA Contour</b> |                                                            |                                             |                                                           |                                             |
|---------------------------------|------------------------------------------------------------|---------------------------------------------|-----------------------------------------------------------|---------------------------------------------|
| <b>Patient</b>                  | <b>Volume outside of 100% IDL of PTV1 (cm<sup>3</sup>)</b> | <b>% Volume outside of 100% IDL of PTV1</b> | <b>Volume outside of 100% IDL of PTV2(cm<sup>3</sup>)</b> | <b>% Volume outside of 100% IDL of PTV2</b> |
| 1                               | 2.8                                                        | 2.2                                         | 36.5                                                      | 28.4                                        |
| 2                               | 4.6                                                        | 4.0                                         | 45.5                                                      | 38.9                                        |
| 3                               | 39.9                                                       | 24.2                                        | 81.5                                                      | 49.6                                        |
| 4                               | 0.4                                                        | 0.7                                         | 20.4                                                      | 33.3                                        |
| 5                               | 10.5                                                       | 6.5                                         | 49.2                                                      | 30.5                                        |
| 6                               | 0.0                                                        | 0.0                                         | 36.4                                                      | 50.1                                        |
| 7                               | 3.5                                                        | 6.4                                         | 15.3                                                      | 28.1                                        |
| 8                               | 0.1                                                        | 0.1                                         | 16.4                                                      | 13.0                                        |
| 9                               | 1.2                                                        | 1.5                                         | 25.9                                                      | 31.6                                        |
| 10                              | 9.1                                                        | 14.8                                        | 34.8                                                      | 56.7                                        |
| 11                              | 64.1                                                       | 55.7                                        | 90.1                                                      | 78.2                                        |
| Mean                            | 12.4                                                       | 10.6                                        | 41.1                                                      | 39.9                                        |
| SD                              | 12.01                                                      | 16.7                                        | 19.7                                                      | 17.7                                        |

  

| <b>1.75-fold Cho/NAA Contour</b> |                                                            |                                             |                                                           |                                             |
|----------------------------------|------------------------------------------------------------|---------------------------------------------|-----------------------------------------------------------|---------------------------------------------|
| <b>Patient</b>                   | <b>Volume outside of 100% IDL of PTV1 (cm<sup>3</sup>)</b> | <b>% Volume outside of 100% IDL of PTV1</b> | <b>Volume outside of 100% IDL of PTV2(cm<sup>3</sup>)</b> | <b>% Volume outside of 100% IDL of PTV2</b> |
| 1                                | 1.5                                                        | 1.5                                         | 24.5                                                      | 23.0                                        |
| 2                                | 2.2                                                        | 2.5                                         | 28.5                                                      | 31.8                                        |
| 3                                | 15.9                                                       | 12.9                                        | 45.3                                                      | 36.7                                        |
| 4                                | 0.1                                                        | 0.3                                         | 12.6                                                      | 26.3                                        |
| 5                                | 3.2                                                        | 2.7                                         | 22.1                                                      | 18.3                                        |
| 6                                | 0                                                          | 0                                           | 17.5                                                      | 39.4                                        |
| 7                                | 2.1                                                        | 4.9                                         | 9.5                                                       | 22.2                                        |
| 8                                | 0.1                                                        | 0.1                                         | 7.5                                                       | 7.5                                         |
| 9                                | 0.4                                                        | 0.7                                         | 13.6                                                      | 22.8                                        |
| 10                               | 3.0                                                        | 7.7                                         | 18.0                                                      | 46.6                                        |
| 11                               | 30.5                                                       | 46.0                                        | 45.5                                                      | 68.4                                        |
| Mean                             | 5.36                                                       | 7.21                                        | 22.2                                                      | 31.2                                        |
| SD                               | 4.74                                                       | 13.5                                        | 11.1                                                      | 16.4                                        |

  

| <b>2.0-fold Cho/NAA Contour</b> |                                                            |                                             |                                                           |                                             |
|---------------------------------|------------------------------------------------------------|---------------------------------------------|-----------------------------------------------------------|---------------------------------------------|
| <b>Patient</b>                  | <b>Volume outside of 100% IDL of PTV1 (cm<sup>3</sup>)</b> | <b>% Volume outside of 100% IDL of PTV1</b> | <b>Volume outside of 100% IDL of PTV2(cm<sup>3</sup>)</b> | <b>% Volume outside of 100% IDL of PTV2</b> |
| 1                               | 1.0                                                        | 1.1                                         | 17.2                                                      | 19.1                                        |
| 2                               | 0.9                                                        | 0.9                                         | 19.8                                                      | 27.6                                        |
| 3                               | 6.8                                                        | 6.8                                         | 25.6                                                      | 27.5                                        |
| 4                               | 0.03                                                       | 0.03                                        | 8.9                                                       | 23.0                                        |
| 5                               | 0.6                                                        | 0.6                                         | 9.0                                                       | 9.5                                         |
| 6                               | 0                                                          | 0                                           | 10.2                                                      | 33.6                                        |
| 7                               | 1.2                                                        | 3.4                                         | 6.0                                                       | 17.9                                        |
| 8                               | 0.01                                                       | 0.02                                        | 4.0                                                       | 4.7                                         |
| 9                               | 0.03                                                       | 0.07                                        | 6.2                                                       | 15.7                                        |
| 10                              | 1.5                                                        | 5.8                                         | 10.5                                                      | 40.9                                        |
| 11                              | 14.0                                                       | 35.1                                        | 22.1                                                      | 55.4                                        |
| Mean                            | 2.37                                                       | 4.89                                        | 12.7                                                      | 25.0                                        |
| SD                              | 2.04                                                       | 10.3                                        | 6.91                                                      | 14.5                                        |

**Abbreviations:** IDL, isodose line; PTV1, planning target volume 1 ( PTV51 or PTV54); PTV2, planning target volume 2 (PTV60).
